# Supplementary material for: Efficacy and safety of endoscopic submucosal dissection for colorectal dysplasia in patients with inflammatory bowel disease: a systematic review and meta-analysis
Source: PubMed Central journal article supplement — Clin Endosc. 2024 Feb 29;57(3):317–28. doi: 10.5946/ce.2023.205 (PMC11133987; doi:10.5946/ce.2023.205), 2024-02-29
Supplement: ce-2023-205-Supplementary-Fig-6.pdf [file ce-2023-205-Supplementary-Fig-6.pdf]

## Metachronous tumors

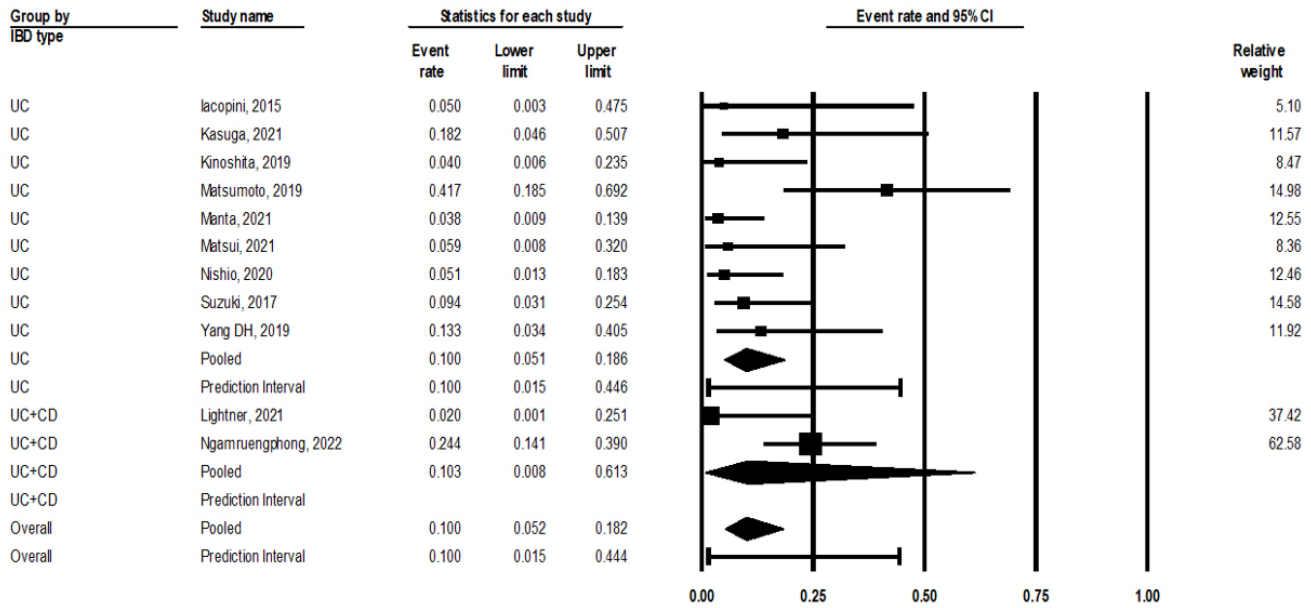

overall I2 = 55%  
 UC = 48%  
 UC+CD = 71%

**Supplementary Fig. 6.** Forest plot for metachronous tumors. CI, confidence interval; UC, ulcerative colitis; CD, Crohn's disease.
