# Supplementary material for: Efficacy and safety of endoscopic submucosal dissection for colorectal dysplasia in patients with inflammatory bowel disease: a systematic review and meta-analysis
Source: PubMed Central journal article supplement — Clin Endosc. 2024 Feb 29;57(3):317–28. doi: 10.5946/ce.2023.205 (PMC11133987; doi:10.5946/ce.2023.205), 2024-02-29
Supplement: ce-2023-205-Supplementary-Material-1.pdf [file ce-2023-205-Supplementary-Material-1.pdf]

**Supplementary Material 1.** Literature search strategy.

A total of 103 records were retrieved via database and register searches and exported to EndNote. Librarian deduplicated the End-Note library using the Bramer method<sup>1</sup>. 47 duplicate references were identified and removed; 56 records were delivered to the systematic review team for screening.

**Table 1.**

| Database/register                                                                                  | Coverage               |
|----------------------------------------------------------------------------------------------------|------------------------|
| Ovid                                                                                               |                        |
| MEDLINE(R) Epub Ahead of Print, In-Process & Other Non-Indexed Citations and Ovid MEDLINE(R) Daily | 1946 to 2022 October 3 |
| Embase                                                                                             | 1974 to 2022 October 3 |
| EBM Reviews Cochrane Central Register of Controlled Trials                                         | 1991 to 2022 October 3 |
| Elsevier                                                                                           |                        |
| Scopus                                                                                             | 1823 to 2022 October 3 |
| Web of Science                                                                                     |                        |
| Science Citation Index Expanded (SCIE)                                                             | 1900 to 2022 October 3 |
| Emerging Sources Citation Index (ESCI)                                                             | 1900 to 2022 October 3 |

Ovid MEDLINE(R) 1946 to Present and Epub Ahead of Print, In-Process & Other Non-Indexed Citations and Ovid MEDLINE(R) Daily

- 1 Endoscopic submucosal dissection/ 3038
- 2 ((endoscopic-submucosal dissection or endoscopic-dissection or colonoscopy-dissection\$) adj3 (inflammatory bowel disease adj (crohns disease or ulcerative colitis))).ab,kf,ti. 2965
- 3 (ESD or hybrid-ESD).ab,kf,ti. 2498
- 4 ((endoscopic-submucosal-dissection or ESD) adj3 (inflammatory bowel disease or IBD or crohns disease or ulcerative colitis)).ab,kf,ti. 3426
- 5 1 or 2 or 3 or 4 6285
- 6 (colorectal neoplasia or colorectal dysplasia).ab,kf,ti. 225
- 7 5 and 6 15
- 8 exp Animals/ not exp Humans/ 4923912
- 9 7 not 8 15
- 10 exp Infant/ 1198456
- 11 exp Child/ 2031664
- 12 Adolescent/ 2143254
- 13 or/10-12 3775398
- 14 exp Adult/ 7665292
- 15 13 not 14 2002885
- 16 9 not 15 15
- 17 english.lg. 28636374
- 18 16 and 17 15

References

1. Bramer WM, Giustini D, de Jonge GB, Holland L, Bekhuis T. De-duplication of database search results for systematic reviews in EndNote. *Journal of the Medical Library Association : JMLA*. 2016;104(3):240-3. Erratum in: *J Med Libr Assoc*. 2017 Jan;105(1):111; PMID: 28096754 [<https://www.ncbi.nlm.nih.gov/pubmed/28096754>]. doi:<https://dx.doi.org/10.3163/1536-5050.104.3.014>

Embase <1974 to 2022 October 03>

- 1 endoscopic submucosal dissection/ 5698
- 2 ((endoscopic-submucosal-dissection or endoscopic-dissection or colonoscopic submucosal dissection\$) adj3 (inflammatory bowel disease adj (crohns disease or ulcerative colitis))).ab,kf,ti. 4999
- 3 (ESD or hybrid-ESD).ab,kf,ti. 6019
- 4 ((endoscopic-submucosal dissection or endoscopic-dissection or ESD) adj3 (inflammatory bowel disease or crohns disease or ulcerative colitis or IBD)).ab,kf,ti. 7748
- 5 1 or 2 or 3 or 4 11632
- 6 (colorectal neoplasia or colorectal dysplasia).ab,kf,ti. 278
- 7 5 and 6 33
- 8 exp animal/ not exp human/ 4864775
- 9 7 not 8 33
- 10 exp infant/ 1047356
- 11 exp juvenile/ 3685760
- 12 10 or 11 3685760
- 13 exp adult/ 9423036
- 14 12 not 13 2348830
- 15 9 not 14 33
- 16 english.lg. 32013747
- 17 15 and 16 33

EBM Reviews - Cochrane Central Register of Controlled Trials <October 2022>

- 1 ((endoscopic-submucosal dissection or endoscopic-dissection or colonoscopic-dissection\$) adj3 (inflammatory bowel disease adj (crohns disease or ulcerative colitis))).ti,hw,ab. 503
- 2 (ESD or hybrid-ESD).ti,hw,ab. 512
- 3 ((endoscopic-submucosal dissection or colonoscopic-dissection or ESD) adj3 (inflammatory bowel disease or crohns disease or ulcerative colitis or IBD)).ti,hw,ab. 588
- 4 1 or 2 or 3 743
- 5 (colorectal neoplasia or colorectal dysplasia or colon polyps or colon adenomas).ti,hw,ab. 21
- 6 4 and 5 15

2021-12-3\_Scopus search strategy

( INDEXTERMS ( {Endoscopic submucosal dissection} OR {colonoscopic dissection} ) OR TITLE-ABS-KEY ( ( endoscopic submucosal dissection OR ESD OR colonoscopic dissection\* ) W/3 ( inflammatory bowel disease W/1 ( crohns disease OR ulcerative colitis ) ) ) OR TITLE-ABS-KEY ( IBD OR CD OR UC ) OR TITLE-ABS-KEY ( ( ESD OR IBD OR CD OR UC ) W/3 ( colorectal dysplasia OR colorectal neoplasia OR colon polyps OR colon adenomas ) ) )

2021-12-3\_Web of Science search strategy

#1 ((TS=((endoscopic submucosal dissection OR endoscopic dissection OR colonoscopic dissection\*) NEAR/3 (inflammatory bowel disease NEAR/1 (crohns disease OR ulcerative colitis)))) OR TS=(ESD)) OR TS=((IBD OR ulcerative colitis OR crohns disease OR UC OR CD) NEAR/3 (colorectal dysplasia OR colorectal neoplasia OR colon polyps OR colon adenomas))
