# Supplementary material for: Efficacy and safety of endoscopic submucosal dissection for colorectal dysplasia in patients with inflammatory bowel disease: a systematic review and meta-analysis
Source: PubMed Central journal article supplement — Clin Endosc. 2024 Feb 29;57(3):317–28. doi: 10.5946/ce.2023.205 (PMC11133987; doi:10.5946/ce.2023.205), 2024-02-29
Supplement: ce-2023-205-Supplementary-Material-3.pdf [file ce-2023-205-Supplementary-Material-3.pdf]

**Supplementary Material 3.** Meta-analyses of Observational Studies in Epidemiology checklist.

| Item no.                                           | Recommendation                                                                                                                                                                                                                                                               | Reported on page no.        |
|----------------------------------------------------|------------------------------------------------------------------------------------------------------------------------------------------------------------------------------------------------------------------------------------------------------------------------------|-----------------------------|
| <b>Reporting of background should include</b>      |                                                                                                                                                                                                                                                                              |                             |
| 1                                                  | Problem definition                                                                                                                                                                                                                                                           | 5                           |
| 2                                                  | Hypothesis statement                                                                                                                                                                                                                                                         | NA                          |
| 3                                                  | Description of study outcome(s)                                                                                                                                                                                                                                              | 6,7                         |
| 4                                                  | Type of exposure or intervention used                                                                                                                                                                                                                                        | 6,7                         |
| 5                                                  | Type of study designs used                                                                                                                                                                                                                                                   | 5,6                         |
| 6                                                  | Study population                                                                                                                                                                                                                                                             | 6                           |
| <b>Reporting of search strategy should include</b> |                                                                                                                                                                                                                                                                              |                             |
| 7                                                  | Qualifications of searchers (eg, librarians and investigators)                                                                                                                                                                                                               | 5, Supplementary Material 1 |
| 8                                                  | Search strategy, including time period included in the synthesis and key words                                                                                                                                                                                               | 5, Supplementary Material 1 |
| 9                                                  | Effort to include all available studies, including contact with authors                                                                                                                                                                                                      | 6                           |
| 10                                                 | Databases and registries searched                                                                                                                                                                                                                                            | Supplementary Material 1    |
| 11                                                 | Search software used, name and version, including special features used (eg, explosion)                                                                                                                                                                                      | NA                          |
| 12                                                 | Use of hand searching (eg, reference lists of obtained articles)                                                                                                                                                                                                             | 6                           |
| 13                                                 | List of citations located and those excluded, including justification                                                                                                                                                                                                        | Supplementary Fig. 1        |
| 14                                                 | Method of addressing articles published in languages other than English                                                                                                                                                                                                      | 6                           |
| 15                                                 | Method of handling abstracts and unpublished studies                                                                                                                                                                                                                         | 6                           |
| 16                                                 | Description of any contact with authors                                                                                                                                                                                                                                      | 6                           |
| <b>Reporting of methods should include</b>         |                                                                                                                                                                                                                                                                              |                             |
| 17                                                 | Description of relevance or appropriateness of studies assembled for assessing the hypothesis to be tested                                                                                                                                                                   | 6                           |
| 18                                                 | Rationale for the selection and coding of data (eg, sound clinical principles or convenience)                                                                                                                                                                                | NA                          |
| 19                                                 | Documentation of how data were classified and coded (eg, multiple raters, blinding and interrater reliability)                                                                                                                                                               | 6                           |
| 20                                                 | Assessment of confounding (eg, comparability of cases and controls in studies where appropriate)                                                                                                                                                                             | NA                          |
| 21                                                 | Assessment of study quality, including blinding of quality assessors, stratification or regression on possible predictors of study results                                                                                                                                   | 6                           |
| 22                                                 | Assessment of heterogeneity                                                                                                                                                                                                                                                  | 9                           |
| 23                                                 | Description of statistical methods (eg, complete description of fixed or random effects models, justification of whether the chosen models account for predictors of study results, dose-response models, or cumulative meta-analysis) in sufficient detail to be replicated | 7                           |
| 24                                                 | Provision of appropriate tables and graphics                                                                                                                                                                                                                                 | Provided                    |
| <b>Reporting of results should include</b>         |                                                                                                                                                                                                                                                                              |                             |
| 25                                                 | Graphic summarizing individual study estimates and overall estimate                                                                                                                                                                                                          | Forest plots provided       |
| 26                                                 | Table giving descriptive information for each study included                                                                                                                                                                                                                 | Tables 1 and 2              |
| 27                                                 | Results of sensitivity testing (eg, subgroup analysis)                                                                                                                                                                                                                       | 8, 9                        |
| 28                                                 | Indication of statistical uncertainty of findings                                                                                                                                                                                                                            | 8, 9                        |
| <b>Reporting of discussion should include</b>      |                                                                                                                                                                                                                                                                              |                             |
| 29                                                 | Quantitative assessment of bias (eg, publication bias)                                                                                                                                                                                                                       | 9                           |
| 30                                                 | Justification for exclusion (eg, exclusion of non-English language citations)                                                                                                                                                                                                | NA                          |
| 31                                                 | Assessment of quality of included studies                                                                                                                                                                                                                                    | Supplementary Table 1       |
| <b>Reporting of conclusions should include</b>     |                                                                                                                                                                                                                                                                              |                             |
| 32                                                 | Consideration of alternative explanations for observed results                                                                                                                                                                                                               | 10-12                       |
| 33                                                 | Generalization of the conclusions (ie, appropriate for the data presented and within the domain of the literature review)                                                                                                                                                    | 10-12                       |
| 34                                                 | Guidelines for future research                                                                                                                                                                                                                                               | 12                          |
| 35                                                 | Disclosure of funding source                                                                                                                                                                                                                                                 | 1                           |

Adapted from Stroup et al. JAMA 2000;283:2008-2012.
