# Supplementary material for: Efficacy and safety of endoscopic submucosal dissection for colorectal dysplasia in patients with inflammatory bowel disease: a systematic review and meta-analysis
Source: PubMed Central journal article supplement — Clin Endosc. 2024 Feb 29;57(3):317–28. doi: 10.5946/ce.2023.205 (PMC11133987; doi:10.5946/ce.2023.205), 2024-02-29
Supplement: ce-2023-205-Supplementary-Table-1.pdf [file ce-2023-205-Supplementary-Table-1.pdf]

**Supplementary Table 1.** Study quality assessment by Newcastle Ottawa Scale

| Study               | Selection                                                |                                        |                                                       | Comparability                |    | Outcome                          |                          | Score                                                                                    |                                   |        |
|---------------------|----------------------------------------------------------|----------------------------------------|-------------------------------------------------------|------------------------------|----|----------------------------------|--------------------------|------------------------------------------------------------------------------------------|-----------------------------------|--------|
|                     | Representativeness of the average adult in community     | Cohort size                            | Information on outcomes                               | Outcome not present at start | NA | Adequate colonoscopic assessment | Follow-up time           |                                                                                          | Adequacy of follow-up             |        |
|                     | Population based: 1; multi-center: 0.5; single-center: 0 | >40 Patients: 1; 39 to 20: 0.5; <20: 0 | Information with clarity: 1; information derived: 0.5 | Not present: 1; present: 0   | NA | Yes: 1; no: 0                    | Yes: 1; not mentioned: 0 | All patients followed up: 1; >50% followed up: 0.5; <50% followed up OR not mentioned: 0 | Max=7, high>5, medium 3-5, low <3 |        |
| Iacopini, 2015      | 0.5                                                      | 0                                      | 1                                                     | 1                            | NA | 1                                | 1                        | 1                                                                                        | 5.5                               | High   |
| Kasuga, 2021        | 0                                                        | 0                                      | 1                                                     | 0                            | NA | 1                                | 1                        | 1                                                                                        | 4                                 | Medium |
| Kochhar, 2018       | 0                                                        | 0                                      | 1                                                     | 1                            | NA | 1                                | 1                        | 1                                                                                        | 5                                 | Medium |
| Kinoshita, 2019     | 0.5                                                      | 0.5                                    | 1                                                     | 0                            | NA | 1                                | 1                        | 0                                                                                        | 4                                 | Medium |
| Lightner, 2021      | 0                                                        | 0.5                                    | 1                                                     | 0                            | NA | 1                                | 1                        | 0.5                                                                                      | 4                                 | Medium |
| Matsumoto, 2019     | 0                                                        | 0                                      | 1                                                     | 0                            | NA | 1                                | 1                        | 1                                                                                        | 4                                 | Medium |
| Manta, 2021         | 0.5                                                      | 1                                      | 1                                                     | 1                            | NA | 1                                | 1                        | 0                                                                                        | 5.5                               | High   |
| Matsui, 2021        | 0                                                        | 0                                      | 1                                                     | 0                            | NA | 1                                | 1                        | 0.5                                                                                      | 3.5                               | Medium |
| Ngamruengphong 2022 | 0.5                                                      | 1                                      | 1                                                     | 0                            | NA | 1                                | 1                        | 0.5                                                                                      | 5                                 | Medium |
| Nishio, 2020        | 0                                                        | 0.5                                    | 1                                                     | 0                            | NA | 1                                | 1                        | 0.5                                                                                      | 4                                 | Medium |
| Suzuki, 2017        | 0.5                                                      | 0.5                                    | 1                                                     | 0                            | NA | 1                                | 1                        | 0.5                                                                                      | 4.5                               | Medium |
| Yang DH, 2019       | 0                                                        | 0                                      | 1                                                     | 0                            | NA | 1                                | 1                        | 0.5                                                                                      | 3.5                               | Medium |

NA, not applicable.
