# Supplementary material for: Efficacy and safety of endoscopic submucosal dissection for colorectal dysplasia in patients with inflammatory bowel disease: a systematic review and meta-analysis
Source: PubMed Central journal article supplement — Clin Endosc. 2024 Feb 29;57(3):317–28. doi: 10.5946/ce.2023.205 (PMC11133987; doi:10.5946/ce.2023.205), 2024-02-29
Supplement: ce-2023-205-Supplementary-Table-2.pdf [file ce-2023-205-Supplementary-Table-2.pdf]

**Supplementary Table 2.** Subgroup sensitivity analysis

| Outcome                      | Pooled rate (95% confidence interval; $I^2$ )                                                                             |                                                                               |
|------------------------------|---------------------------------------------------------------------------------------------------------------------------|-------------------------------------------------------------------------------|
|                              | Geography (USA, Asia & others)                                                                                            | Sample size (<20 & >20)                                                       |
| <i>En bloc</i> resection     | USA: 93% (84.1–97.1; 7%) 3 studies<br>Asia: 93.4% (85.9–97; 0%) 6 studies<br>Others: 91.6% (72.7–97.8; 51%) 3 studies     | <20: 87.8% (76.9–94; 0%) 6 studies<br>>20: 94.7% (90.1–97.2; 0%) 6 studies    |
| R0 resection                 | USA: 83.5% (59.3–94.6; 61%) 2 studies<br>Asia: 78.4% (66.6–86.9; 29%) 6 studies<br>Others: 85.6% (59.4–96; 74%) 3 studies | <20: 74.9% (62.8–84.1; 0%) 5 studies<br>>20: 86% (73.9–93; 67%) 6 studies     |
| Curative resection           | USA: 6.7% (2.2–18.7; 0%) 1 study<br>Asia: 75.4% (55.8–88.2; 62%) 5 studies<br>Others: 88.4% (42.3–98.8; 82%) 2 studies    | <20: 71.6% (57.5–82.4; 0%) 4 studies<br>>20: 73.9% (17.8–97.3; 94%) 4 studies |
| Bleeding                     | USA: 7.5% (3.1–16.7; 0%) 3 studies<br>Asia: 5.3% (1.5–17.3; 42%) 6 studies<br>Others: 10.8% (5.6–19.7; 1%) 3 studies      | <20: 11.5% (5.1–24; 1%) 6 studies<br>>20: 6.8% (3.3–13.3; 25%) 6 studies      |
| Perforation                  | USA: 3.5% (1–11.5; 0%) 3 studies<br>Asia: 6.6% (3.2–13.3; 0%) 6 studies<br>Others: 4.7% (1.8–12; 0%) 3 studies            | <20: 4.3% (1.4–12.6; 0%) 6 studies<br>>20: 5.7% (3.1–10.1; 0%) 6 studies      |
| Local recurrence             | USA: 2.9% (0.7–10.8; 0%) 3 studies<br>Asia: 5.4% (2.1–12.9; 0%) 6 studies<br>Others: 2.6% (0.6–9.8; 0%) 3 studies         | <20: 7.3% (2.9–17; 0%) 6 studies<br>>20: 2% (0.7–5.1; 0%) 6 studies; $p=0.05$ |
| Metachronous recurrence      | USA: 10.3% (0.8–61.3; 71%) 2 studies<br>Asia: 12.3% (5.1–26.9; 56%) 6 studies<br>Others: 6.3% (2.8–13.8; 0%) 3 studies    | <20: 17.2% (7.4–35; 39%) 5 studies<br>>20: 7.5% (3–17.3; 64%) 6 studies       |
| Additional surgery after ESD | USA: 15.7% (2.9–54; 81%) 3 studies<br>Asia: 15.7% (9.7–24.5; 6%) 6 studies<br>Others: 8.4% (3.9–17.1; 5%) 3 studies       | <20: 15.9% (8.7–27.5; 0%) 6 studies<br>>20: 12.6% (5.7–25.7; 74%) 6 studies   |

ESD, endoscopic submucosal dissection.
