# Supplementary figures and images for: Efficacy and safety of endoscopic submucosal dissection for colorectal dysplasia in patients with inflammatory bowel disease: a systematic review and meta-analysis
Source: PubMed Central journal article supplement — Clin Endosc. 2024 Feb 29;57(3):317–28. doi: 10.5946/ce.2023.205 (PMC11133987; doi:10.5946/ce.2023.205), 2024-02-29

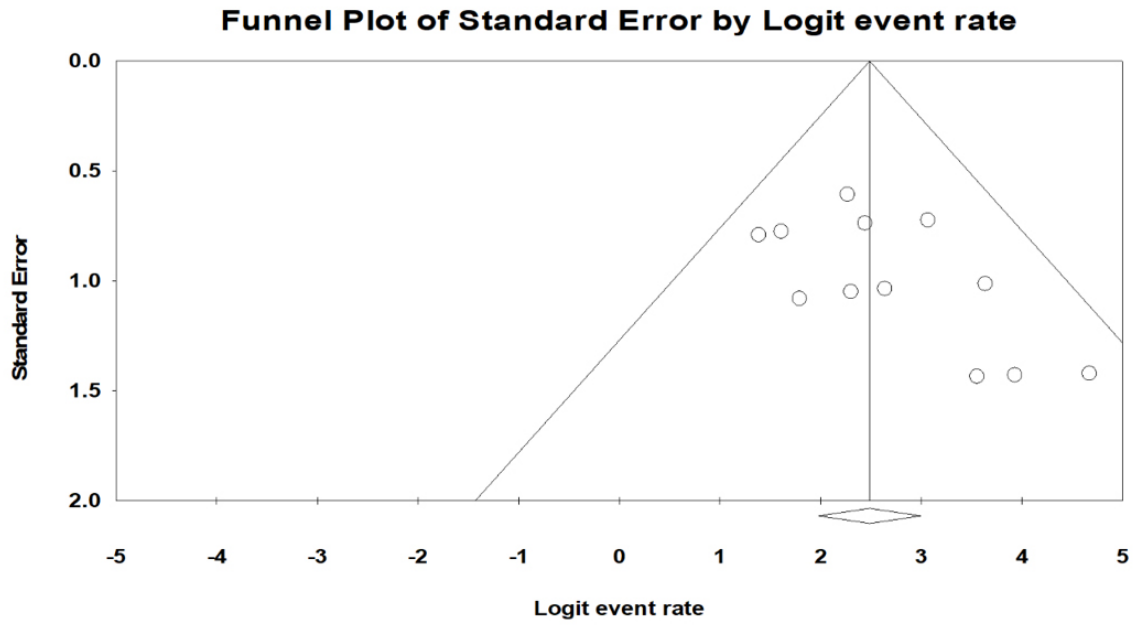

**Supplementary Fig. 8.** Funnel plot for publication bias.

Supplement: ce-2023-205-Supplementary-Fig-8.pdf [file ce-2023-205-Supplementary-Fig-8.pdf]
